# Supplementary material
Source: HighWire-hosted journal article supplement (https://clincancerres.aacrjournals.org/content/suppl/2013/04/23/1078-0432.CCR-12-2043)
Supplement: tab1.pdf [file tab1.pdf]

**Supplementary Table 1.** MiRNAs whose expression in pPCL is significantly positively associated with the DNA copy number (CN) of the genomic locus harboring the corresponding gene (Kendall's  $\tau$  correlation, one-sided p-value < .05).

| miRNA           | Chromosomal location <sup>a</sup> | CN=1, | CN=2, | CN=3, | CN=4, | CN=5, |
|-----------------|-----------------------------------|-------|-------|-------|-------|-------|
|                 |                                   | n     | n     | n     | n     | n     |
| hsa-miR-197     | 1p13.3                            | 4     | 11    | 1     | /     | /     |
| hsa-miR-186     | 1p31.1                            | 3     | 13    | /     | /     | /     |
| hsa-miR-30e     | 1p34.2                            | 3     | 12    | /     | 1     | /     |
| hsa-miR-30e*    | 1p34.2                            | 3     | 12    | /     | 1     | /     |
| hsa-miR-30c     | 1p34.2                            | 3     | 12    | /     | 1     | /     |
| hsa-miR-29c*    | 1q32.2                            | /     | 9     | 6     | /     | 1     |
| hsa-miR-28-5p   | 3q28                              | 1     | 13    | 2     | /     | /     |
| hsa-miR-103     | 5q35.1                            | 1     | 13    | 1     | 1     | /     |
| hsa-miR-148a    | 7p15.2                            | 1     | 13    | 1     | 1     | /     |
| hsa-miR-210     | 11p15.5                           | /     | 14    | 1     | 1     | /     |
| hsa-miR-483-5p  | 11p15.5                           | /     | 14    | 1     | 1     | /     |
| hsa-miR-331-3p  | 12q22                             | 2     | 13    | /     | 1     | /     |
| hsa-miR-15a     | 13q14.3                           | 12    | 3     | 1     | /     | /     |
| hsa-miR-92a     | 13q31.3                           | 9     | 6     | 1     | /     | /     |
| hsa-miR-19a     | 13q31.3                           | 9     | 6     | 1     | /     | /     |
| hsa-miR-20a     | 13q31.3                           | 9     | 6     | 1     | /     | /     |
| hsa-miR-20a*    | 13q31.3                           | 9     | 6     | 1     | /     | /     |
| hsa-miR-342-3p  | 14q32.2                           | 3     | 12    | /     | 1     | /     |
| hsa-miR-630     | 15q24.1                           | 1     | 14    | /     | 1     | /     |
| hsa-miR-1225-5p | 16p13.3                           | 2     | 13    | /     | 1     | /     |
| hsa-miR-140-5p  | 16q22.1                           | 6     | 8     | /     | 1     | 1     |
| hsa-miR-22      | 17p13.3                           | 5     | 11    | /     | /     | /     |
| hsa-miR-181d    | 19p13.12                          | /     | 13    | 2     | 1     | /     |

<sup>a</sup>For miRNAs produced from distinct genomic *loci*, the expression of the mature miRNA was correlated with the DNA CN of each of these genomic locations. The chromosomal location of the genomic *locus* resulted to be associated with mature miRNA expression is indicated, along with the number of pPCL cases having the reported inferred DNA copy number of that *locus*.
